# Supplementary material
Source: PubMed Central journal article supplement (PMC4909249)
Supplement: f-72-00480-sup1.pdf [file f-72-00480-sup1.pdf]

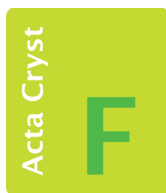

STRUCTURAL BIOLOGY  
COMMUNICATIONS

**Volume 72 (2016)**

**Supporting information for article:**

**Expression, purification, and crystallization of a plant-specific DUF1110 protein from *Oryza sativa***

**Kenichi Harada, Eiki Yamashita, Kento Inoue, Koji Yamaguchi, Toshimichi Fujiwara, Atsushi Nakagawa, Tsutomu Kawasaki and Chojiro Kojima**

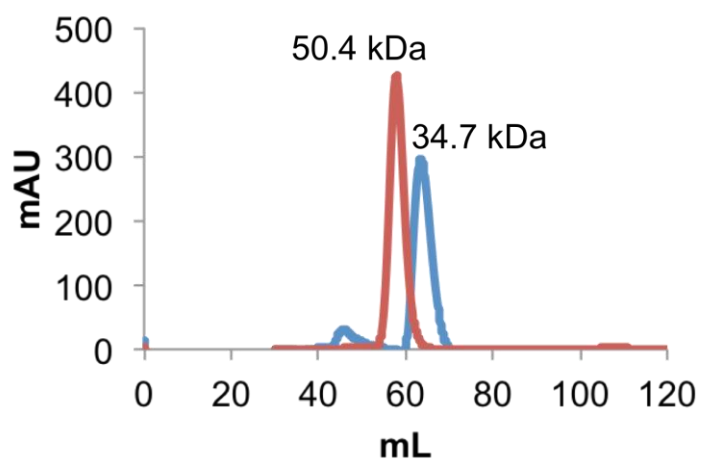

**Figure S1** SEC profile of GST-tag shows a peak at MW of 50.4 kDa (eluting at 57.8 mL) (shown in red), whereas Os01T0156300 protein is 34.7 kDa (eluting at 63.5 mL) (shown in blue). The expected MW for the Os01T0156300 protein and GST-tag are 20.8 kDa and 28.5 kDa, respectively.

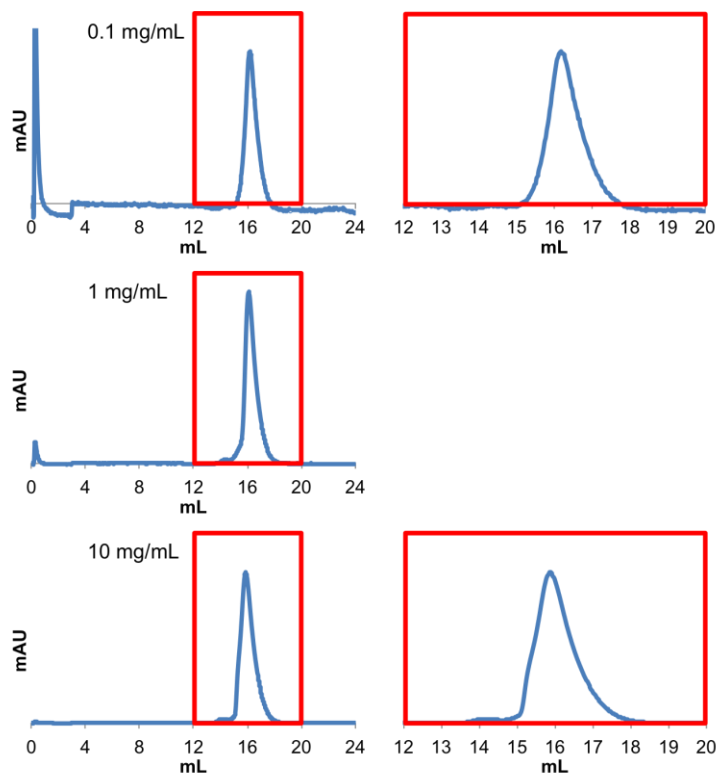

**Figure S2** The concentration dependence of SEC profile of Os01T0156300 protein. At 10 mg/mL, the shoulder-peak appears at left side (high MW side).

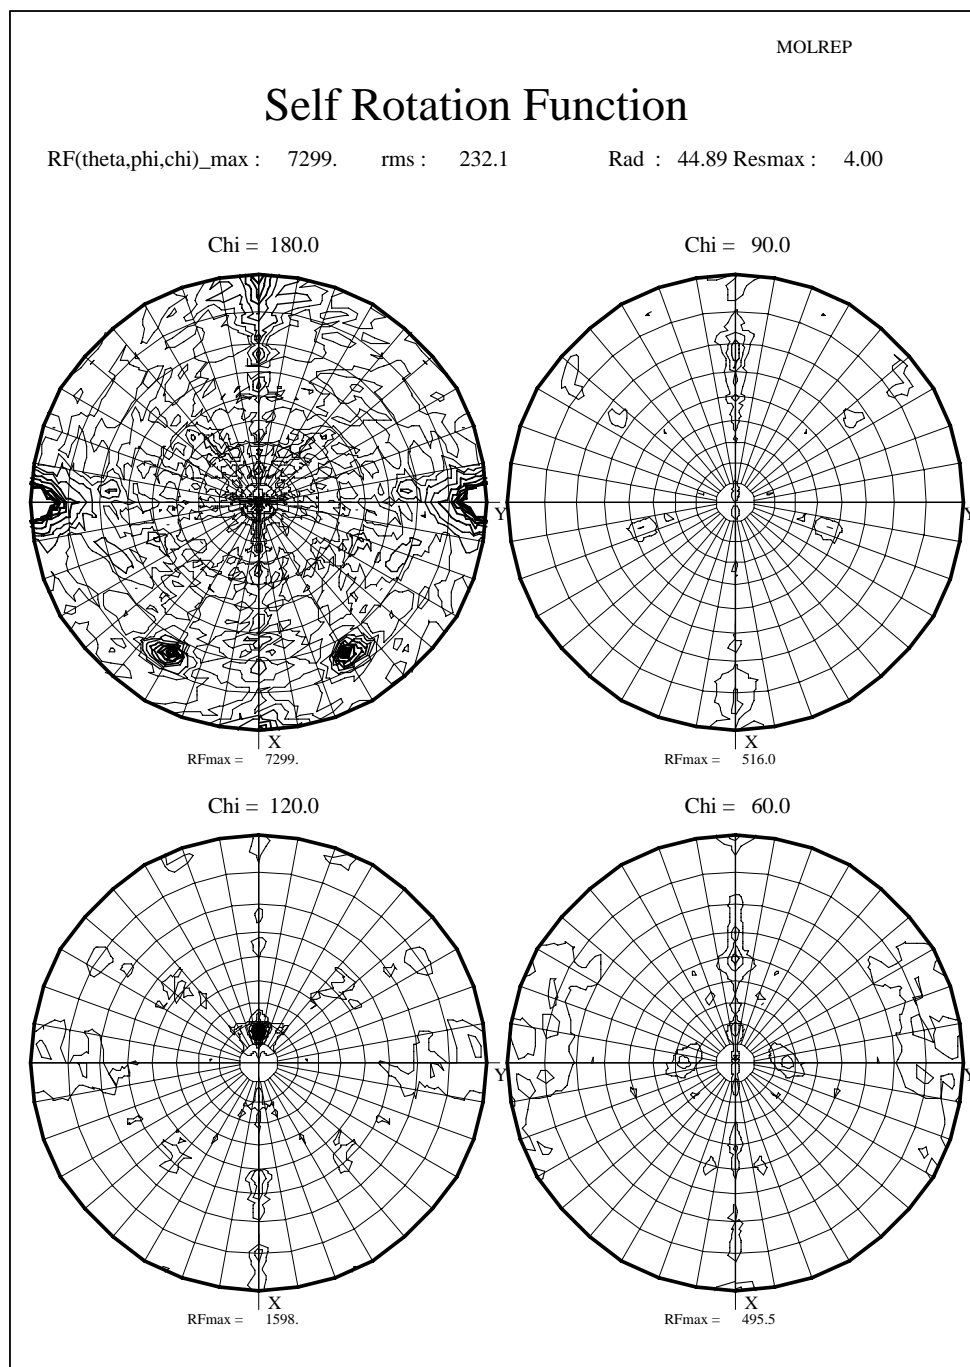

**Figure S3** Self-rotation functions computed using MOLREP (Vagin & Teplyakov, 1997) from CCP4 (Winn *et al.*, 2011) in the resolution range 20.0–4.0 Å to find higher non-crystallographic (NCS) symmetry. The self-rotation map at  $\chi = 180^\circ$  revealed the NCS twofold axes, and the NCS threefold axis was indicated by the self-rotation function at  $\chi = 120^\circ$ .
